# Supplementary material for: Afadin couples RAS GTPases to the polarity rheostat Scribble
Source: Research Square preprint supplement (doi:10.21203/rs.3.rs-1074956/v1), 2021-11-22
Supplement: Supplementary file 1 [file 719c50b72c70c149058222fc.xlsx]

## Sheet: AFDN BioID
Table S1. BioID proteomics-identified proteins with in vivo proximity to the short and long isoforms of AFDN.
		Post-SAINT SpecSum
Gene ID	Gene Name	ISO1	ISO2	Aliases	Gene	GO CC (5)	GO BP (5)	Description
23513	SCRIB	427	430	CRIB1, SCRB1, SCRIB1, Vartul	scribbled homolog (Drosophila)	plasma membrane, cell-cell junction, adherens junction, cell-cell adherens junction, extrinsic to membrane	GO:0000902~cell morphogenesis,GO:0001919~regulation of receptor recycling,GO:0001921~positive regulation of receptor recycling,GO:0002009~morphogenesis of an epithelium,GO:0006915~apoptosis,GO:0006928~cell motion,GO:0006935~chemotaxis,GO:0007155~cell adhesion,GO:0007163~establishment or maintenance of cell polarity,GO:0007346~regulation of mitotic cell cycle,GO:0007610~behavior,GO:0007626~locomot…	0
9231	DLG5	379	349	LP-DLG, P-DLG5, PDLG	discs, large homolog 5 (Drosophila)	plasma membrane, cell-cell junction, adherens junction, cell-cell adherens junction, extrinsic to membrane	GO:0007155~cell adhesion,GO:0007242~intracellular signaling cascade,GO:0008285~negative regulation of cell proliferation,GO:0010941~regulation of cell death,GO:0016337~cell-cell adhesion,GO:0022610~biological adhesion,GO:0042127~regulation of cell proliferation,GO:0042981~regulation of apoptosis,GO:0043067~regulation of programmed cell death,	This gene encodes a member of the family of discs large (DLG) homologs, a subset of the membrane-associated guanylate kinase (MAGUK) superfamily. The MAGUK proteins are composed of a catalytically inactive guanylate kinase domain, in addition to PDZ and SH3 domains, and are thought to function as scaffolding molecules at sites of cell-cell contact. The protein encoded by this gene localizes to th…
10298	PAK4	167	186	-	p21 protein (Cdc42/Rac)-activated kinase 4	Golgi apparatus	GO:0006468~protein amino acid phosphorylation,GO:0006793~phosphorus metabolic process,GO:0006796~phosphate metabolic process,GO:0006928~cell motion,GO:0016310~phosphorylation,	PAK proteins, a family of serine/threonine p21-activating kinases, include PAK1, PAK2, PAK3 and PAK4. PAK proteins are critical effectors that link Rho GTPases to cytoskeleton reorganization and nuclear signaling. They serve as targets for the small GTP binding proteins Cdc42 and Rac and have been implicated in a wide range of biological activities. PAK4 interacts specifically with the GTP-bound …
7159	TP53BP2	164	132	53BP2, ASPP2, BBP, P53BP2, PPP1R13A	tumor protein p53 binding protein, 2	perinuclear region of cytoplasm	GO:0006915~apoptosis,GO:0006917~induction of apoptosis,GO:0007049~cell cycle,GO:0008219~cell death,GO:0010941~regulation of cell death,GO:0010942~positive regulation of cell death,GO:0012501~programmed cell death,GO:0012502~induction of programmed cell death,GO:0016265~death,GO:0042981~regulation of apoptosis,GO:0043065~positive regulation of apoptosis,GO:0043067~regulation of programmed cell dea…	This gene encodes a member of the ASPP (apoptosis-stimulating protein of p53) family of p53 interacting proteins. The protein contains four ankyrin repeats and an SH3 domain involved in protein-protein interactions. It is localized to the perinuclear region of the cytoplasm, and regulates apoptosis and cell growth through interactions with other regulatory molecules including members of the p53 f…
1500	CTNND1	152	150	CAS, CTNND, P120CAS, P120CTN, p120, p120(CAS), p120(CTN)	catenin (cadherin-associated protein), delta 1	cell fraction, membrane fraction, insoluble fraction, plasma membrane, lamellipodium	GO:0006350~transcription,GO:0007155~cell adhesion,GO:0007166~cell surface receptor linked signal transduction,GO:0016055~Wnt receptor signaling pathway,GO:0016337~cell-cell adhesion,GO:0022610~biological adhesion,GO:0045449~regulation of transcription,	This gene encodes a member of the Armadillo protein family, which function in adhesion between cells and signal transduction. Multiple translation initiation codons and althernative splicing result in many different isoforms being translated. Not all of the full-length natures of the described transcript variants have been determined. [provided by RefSeq],
54477	PLEKHA5	103	119	PEPP-2, PEPP2	pleckstrin homology domain containing, family A member 5		0	0
25945	PVRL3	90	86	CD113, CDW113, NECTIN-3, PPR3, PRR3, PVRR3	poliovirus receptor-related 3	plasma membrane, cell-cell junction, adherens junction, cell-cell adherens junction, integral to membrane	GO:0001654~eye development,GO:0002088~lens development in camera-type eye,GO:0002089~lens morphogenesis in camera-type eye,GO:0007155~cell adhesion,GO:0007156~homophilic cell adhesion,GO:0007423~sensory organ development,GO:0009566~fertilization,GO:0016337~cell-cell adhesion,GO:0019953~sexual reproduction,GO:0022610~biological adhesion,GO:0043010~camera-type eye development,GO:0048592~eye morphog…	Nectins (e.g., PVRL1; MIM 600644) are immunoglobulin-like adhesion molecules that interact with afadin (AF6; MIM 159559). Afadin is an actin filament-binding protein that connects nectins to the actin cytoskeleton. The nectin-afadin system organizes adherens junctions cooperatively with the cadherin (see MIM 192090)-catenin (see MIM 116805) system in epithelial cells.[supplied by OMIM],
57584	ARHGAP21	89	84	ARHGAP10	Rho GTPase activating protein 21	Golgi apparatus, cytoskeleton, plasma membrane, extrinsic to membrane, cell junction	0	ARHGAP21 functions preferentially as a GTPase-activating protein (GAP) for CDC42 (MIM 116952) and regulates the ARP2/3 complex (MIM 604221) and F-actin dynamics at the Golgi through control of CDC42 activity (Dubois et al., 2005 [PubMed 15793564]).[supplied by OMIM],
23094	SIPA1L3	81	73	SPAL3	signal-induced proliferation-associated 1 like 3		GO:0051056~regulation of small GTPase mediated signal transduction,	0
324	APC	76	107	BTPS2, DP2, DP2.5, DP3, GS, PPP1R46	adenomatous polyposis coli	chromosome, centromeric region, kinetochore, chromosome, centrosome, microtubule organizing center	GO:0000075~cell cycle checkpoint,GO:0000079~regulation of cyclin-dependent protein kinase activity,GO:0000087~M phase of mitotic cell cycle,GO:0000278~mitotic cell cycle,GO:0000279~M phase,GO:0000280~nuclear division,GO:0000281~cytokinesis after mitosis,GO:0000902~cell morphogenesis,GO:0000904~cell morphogenesis involved in differentiation,GO:0000910~cytokinesis,GO:0001654~eye development,GO:0001…	This gene encodes a tumor suppressor protein that acts as an antagonist of the Wnt signaling pathway. It is also involved in other processes including cell migration and adhesion, transcriptional activation, and apoptosis. Defects in this gene cause familial adenomatous polyposis (FAP), an autosomal dominant pre-malignant disease that usually progresses to malignancy. Disease-associated mutations…
317762	CCDC85C	75	71	-	coiled-coil domain containing 85C		0	0
84445	LZTS2	75	65	LAPSER1	leucine zipper, putative tumor suppressor 2	centrosome, microtubule organizing center, cytoskeleton, microtubule, microtubule cytoskeleton	GO:0000087~M phase of mitotic cell cycle,GO:0000278~mitotic cell cycle,GO:0000279~M phase,GO:0000280~nuclear division,GO:0007049~cell cycle,GO:0007067~mitosis,GO:0007166~cell surface receptor linked signal transduction,GO:0016055~Wnt receptor signaling pathway,GO:0022402~cell cycle process,GO:0022403~cell cycle phase,GO:0048285~organelle fission,GO:0051301~cell division,	0
11228	RASSF8	74	60	C12orf2, HOJ1	Ras association (RalGDS/AF-6) domain family (N-terminal) member 8		0	0
440193	CCDC88C	72	64	DAPLE, HKRP2, KIAA1509	coiled-coil domain containing 88C	cell fraction, insoluble fraction	GO:0001932~regulation of protein amino acid phosphorylation,GO:0006461~protein complex assembly,GO:0007166~cell surface receptor linked signal transduction,GO:0010608~posttranscriptional regulation of gene expression,GO:0016055~Wnt receptor signaling pathway,GO:0019220~regulation of phosphate metabolic process,GO:0031399~regulation of protein modification process,GO:0031647~regulation of protein …	0
6091	ROBO1	69	91	DUTT1, SAX3	roundabout, axon guidance receptor, homolog 1 (Drosophila); similar to roundabout 1 isoform b	plasma membrane, integral to plasma membrane, cell surface, integral to membrane, axon	GO:0000902~cell morphogenesis,GO:0000904~cell morphogenesis involved in differentiation,GO:0001525~angiogenesis,GO:0001568~blood vessel development,GO:0001944~vasculature development,GO:0002040~sprouting angiogenesis,GO:0002042~cell migration during sprouting angiogenesis,GO:0006928~cell motion,GO:0006935~chemotaxis,GO:0007155~cell adhesion,GO:0007156~homophilic cell adhesion,GO:0007409~axonogene…	Bilateral symmetric nervous systems have special midline structures that establish a partition between the two mirror image halves. Some axons project toward and across the midline in response to long-range chemoattractants emanating from the midline. The product of this gene is a member of the immunoglobulin gene superfamily and encodes an integral membrane protein that functions in axon guidanc…
25921	ZDHHC5	66	83	DHHC5, ZNF375	zinc finger, DHHC-type containing 5	integral to membrane, intrinsic to membrane	0	0
4810	NHS	54	40	CTRCT40, CXN, SCML1	Nance-Horan syndrome (congenital cataracts and dental anomalies)		GO:0001654~eye development,GO:0002088~lens development in camera-type eye,GO:0007423~sensory organ development,GO:0043010~camera-type eye development,	This gene encodes a protein containing four conserved nuclear localization signals. The encoded protein may function during the development of the eyes, teeth, and brain. Mutations in this gene have been shown to cause Nance-Horan syndrome. Alternatively spliced transcript variants encoding different isoforms have been described for this gene. [provided by RefSeq],
8502	PKP4	52	41	p0071	plakophilin 4	plasma membrane, cell-cell junction, apicolateral plasma membrane, cell junction, desmosome	GO:0007155~cell adhesion,GO:0022610~biological adhesion,	Armadillo-like proteins are characterized by a series of armadillo repeats, first defined in the Drosophila 'armadillo' gene product, that are typically 42 to 45 amino acids in length. These proteins can be divided into subfamilies based on their number of repeats, their overall sequence similarity, and the dispersion of the repeats throughout their sequences. Members of the p120(ctn)/plakophilin…
23368	PPP1R13B	51	39	ASPP1, p53BP2-like, p85	protein phosphatase 1, regulatory (inhibitor) subunit 13B		GO:0006915~apoptosis,GO:0006917~induction of apoptosis,GO:0008219~cell death,GO:0010941~regulation of cell death,GO:0010942~positive regulation of cell death,GO:0012501~programmed cell death,GO:0012502~induction of programmed cell death,GO:0016265~death,GO:0042981~regulation of apoptosis,GO:0043065~positive regulation of apoptosis,GO:0043067~regulation of programmed cell death,GO:0043068~positive…	This gene encodes a member of the ASPP (apoptosis-stimulating protein of p53) family of p53 interacting proteins. The protein contains four ankyrin repeats and an SH3 domain involved in protein-protein interactions. ASPP proteins are required for the induction of apoptosis by p53-family proteins. They promote DNA binding and transactivation of p53-family proteins on the promoters of proapoptotic …
81839	VANGL1	39	37	KITENIN, LPP2, STB2, STBM2	vang-like 1 (van gogh, Drosophila)	integral to membrane, intrinsic to membrane	0	0
57619	SHROOM3	39	22	APXL3, SHRM, ShrmL	shroom family member 3	cytoskeleton, microtubule, plasma membrane, cell-cell junction, adherens junction	GO:0000902~cell morphogenesis,GO:0001838~embryonic epithelial tube formation,GO:0001841~neural tube formation,GO:0001843~neural tube closure,GO:0002009~morphogenesis of an epithelium,GO:0002064~epithelial cell development,GO:0002065~columnar/cuboidal epithelial cell differentiation,GO:0002066~columnar/cuboidal epithelial cell development,GO:0007010~cytoskeleton organization,GO:0007389~pattern spe…	0
1431	CS	39		-	citrate synthase	mitochondrion, mitochondrial matrix, membrane-enclosed lumen, mitochondrial lumen, organelle lumen	GO:0006084~acetyl-CoA metabolic process,GO:0006091~generation of precursor metabolites and energy,GO:0006099~tricarboxylic acid cycle,GO:0006101~citrate metabolic process,GO:0006107~oxaloacetate metabolic process,GO:0006732~coenzyme metabolic process,GO:0009060~aerobic respiration,GO:0009109~coenzyme catabolic process,GO:0015980~energy derivation by oxidation of organic compounds,GO:0043648~dicar…	The protein encoded by this gene is a Krebs tricarboxylic acid cycle enzyme that catalyzes the synthesis of citrate from oxaloacetate and acetyl coenzyme A. The enzyme is found in nearly all cells capable of oxidative metablism. This protein is nuclear encoded and transported into the mitochondrial matrix, where the mature form is found. [provided by RefSeq],
1495	CTNNA1	36	25	CAP102	catenin (cadherin-associated protein), alpha 1, 102kDa	cytoskeleton, plasma membrane, adherens junction, internal side of plasma membrane, actin cytoskeleton	GO:0007043~cell-cell junction assembly,GO:0007155~cell adhesion,GO:0022610~biological adhesion,GO:0034329~cell junction assembly,GO:0034330~cell junction organization,GO:0043297~apical junction assembly,GO:0045216~cell-cell junction organization,	0
1956	EGFR	35	48	ERBB, ERBB1, HER1, PIG61, mENA	epidermal growth factor receptor (erythroblastic leukemia viral (v-erb-b) oncogene homolog, avian)	extracellular region, extracellular space, endosome, plasma membrane, coated pit	GO:0000079~regulation of cyclin-dependent protein kinase activity,GO:0000082~G1/S transition of mitotic cell cycle,GO:0000165~MAPKKK cascade,GO:0000186~activation of MAPKK activity,GO:0000278~mitotic cell cycle,GO:0000902~cell morphogenesis,GO:0001501~skeletal system development,GO:0001503~ossification,GO:0001775~cell activation,GO:0001932~regulation of protein amino acid phosphorylation,GO:00064…	The protein encoded by this gene is a transmembrane glycoprotein that is a member of the protein kinase superfamily. This protein is a receptor for members of the epidermal growth factor family. EGFR is a cell surface protein that binds to epidermal growth factor. Binding of the protein to a ligand induces receptor dimerization and tyrosine autophosphorylation and leads to cell proliferation. Mut…
811	CALR	33		CRT, HEL-S-99n, RO, SSA, cC1qR	calreticulin	cell fraction, extracellular region, proteinaceous extracellular matrix, extracellular space, membrane fraction	GO:0000122~negative regulation of transcription from RNA polymerase II promoter,GO:0002396~MHC protein complex assembly,GO:0002397~MHC class I protein complex assembly,GO:0002474~antigen processing and presentation of peptide antigen via MHC class I,GO:0002501~peptide antigen assembly with MHC protein complex,GO:0002502~peptide antigen assembly with MHC class I protein complex,GO:0006275~regulati…	Calreticulin is a multifunctional protein that acts as a major Ca(2+)-binding (storage) protein in the lumen of the endoplasmic reticulum. It is also found in the nucleus, suggesting that it may have a role in transcription regulation. Calreticulin binds to the synthetic peptide KLGFFKR, which is almost identical to an amino acid sequence in the DNA-binding domain of the superfamily of nuclear re…
23167	EFR3A	28	38	-	EFR3 homolog A (S. cerevisiae)	plasma membrane	0	0
9712	USP6NL	28	23	RNTRE, TRE2NL, USP6NL-IT1	USP6 N-terminal like		GO:0032313~regulation of Rab GTPase activity,GO:0032318~regulation of Ras GTPase activity,GO:0032483~regulation of Rab protein signal transduction,GO:0043087~regulation of GTPase activity,GO:0046578~regulation of Ras protein signal transduction,GO:0051056~regulation of small GTPase mediated signal transduction,GO:0051336~regulation of hydrolase activity,	0
9497	SLC4A7	27	41	NBC2, NBC3, NBCN1, SBC2, SLC4A6	solute carrier family 4, sodium bicarbonate cotransporter, member 7	plasma membrane, microvillus, integral to membrane, intrinsic to membrane, stereocilium	GO:0006811~ion transport,GO:0006812~cation transport,GO:0006814~sodium ion transport,GO:0006820~anion transport,GO:0015672~monovalent inorganic cation transport,GO:0015698~inorganic anion transport,GO:0015701~bicarbonate transport,GO:0015711~organic anion transport,GO:0030001~metal ion transport,	0
7037	TFRC	26	25	CD71, T9, TFR, TFR1, TR, TRFR, p90	transferrin receptor (p90, CD71)	extracellular region, mitochondrion, endosome, plasma membrane, integral to plasma membrane	GO:0001666~response to hypoxia,GO:0002526~acute inflammatory response,GO:0006873~cellular ion homeostasis,GO:0006879~cellular iron ion homeostasis,GO:0006897~endocytosis,GO:0006952~defense response,GO:0006953~acute-phase response,GO:0006954~inflammatory response,GO:0007568~aging,GO:0007584~response to nutrient,GO:0009611~response to wounding,GO:0009991~response to extracellular stimulus,GO:001003…	0
1824	DSC2	24	28	ARVD11, CDHF2, DG2, DGII/III, DSC3	desmocollin 2	plasma membrane, cell-cell junction, integral to membrane, apicolateral plasma membrane, cell junction	GO:0007155~cell adhesion,GO:0007156~homophilic cell adhesion,GO:0016337~cell-cell adhesion,GO:0022610~biological adhesion,	The protein encoded by this gene is a calcium-dependent glycoprotein that is a member of the desmocollin subfamily of the cadherin superfamily. These desmosomal family members, along with the desmogleins, are found primarily in epithelial cells where they constitute the adhesive proteins of the desmosome cell-cell junction and are required for cell adhesion and desmosome formation. The desmosomal…
159195	USP54	24	22	C10orf29, bA137L10.3, bA137L10.4	ubiquitin specific peptidase 54		GO:0006508~proteolysis,GO:0006511~ubiquitin-dependent protein catabolic process,GO:0009057~macromolecule catabolic process,GO:0019941~modification-dependent protein catabolic process,GO:0030163~protein catabolic process,GO:0043632~modification-dependent macromolecule catabolic process,GO:0044257~cellular protein catabolic process,GO:0044265~cellular macromolecule catabolic process,GO:0051603~prot…	0
2923	PDIA3	21		ER60, ERp57, ERp60, ERp61, GRP57, GRP58, HEL-S-269, HEL-S-93n, HsT17083, P58, PI-PLC	protein disulfide isomerase family A, member 3	endoplasmic reticulum, endoplasmic reticulum lumen, cytoplasmic membrane-bounded vesicle, cytoplasmic vesicle, membrane-enclosed lumen	GO:0006605~protein targeting,GO:0006606~protein import into nucleus,GO:0006621~protein retention in ER lumen,GO:0006886~intracellular protein transport,GO:0006913~nucleocytoplasmic transport,GO:0008104~protein localization,GO:0010941~regulation of cell death,GO:0010942~positive regulation of cell death,GO:0015031~protein transport,GO:0017038~protein import,GO:0019725~cellular homeostasis,GO:00325…	This gene encodes a protein of the endoplasmic reticulum that interacts with lectin chaperones calreticulin and calnexin to modulate folding of newly synthesized glycoproteins. The protein was once thought to be a phospholipase; however, it has been demonstrated that the protein actually has protein disulfide isomerase activity. It is thought that complexes of lectins and this protein mediate pro…
55789	DEPDC1B	20	20	BRCC3, XTP1	DEP domain containing 1B		GO:0007242~intracellular signaling cascade,	0
5819	PVRL2	20	18	CD112, HVEB, PRR2, PVRR2	poliovirus receptor-related 2 (herpesvirus entry mediator B)	plasma membrane, cell-cell junction, adherens junction, cell-cell adherens junction, zonula adherens	GO:0001910~regulation of leukocyte mediated cytotoxicity,GO:0001912~positive regulation of leukocyte mediated cytotoxicity,GO:0001914~regulation of T cell mediated cytotoxicity,GO:0001916~positive regulation of T cell mediated cytotoxicity,GO:0002684~positive regulation of immune system process,GO:0002694~regulation of leukocyte activation,GO:0002696~positive regulation of leukocyte activation,GO…	This gene encodes a single-pass type I membrane glycoprotein with two Ig-like C2-type domains and an Ig-like V-type domain. This protein is one of the plasma membrane components of adherens junctions. It also serves as an entry for certain mutant strains of herpes simplex virus and pseudorabies virus, and it is involved in cell to cell spreading of these viruses. Variations in this gene have been…
8496	PPFIBP1	17	32	L2, SGT2, hSGT2, hSgt2p	PTPRF interacting protein, binding protein 1 (liprin beta 1)	plasma membrane	GO:0006259~DNA metabolic process,GO:0007155~cell adhesion,GO:0015074~DNA integration,GO:0022610~biological adhesion,	The protein encoded by this gene is a member of the LAR protein-tyrosine phosphatase-interacting protein (liprin) family. Liprins interact with members of LAR family of transmembrane protein tyrosine phosphatases, which are known to be important for axon guidance and mammary gland development. It has been proposed that liprins are multivalent proteins that form complex structures and act as scaff…
4162	MCAM	17	27	CD146, MUC18	melanoma cell adhesion molecule	plasma membrane, integral to membrane, intrinsic to membrane	GO:0007155~cell adhesion,GO:0022610~biological adhesion,	0
55243	KIRREL	16	21	NEPH1	kin of IRRE like (Drosophila)	plasma membrane, integral to membrane, intrinsic to membrane	GO:0007588~excretion,GO:0046903~secretion,	NEPH1 is a member of the nephrin-like protein family, which includes NEPH2 (MIM 607761) and NEPH3 (MIM 607762). The cytoplasmic domains of these proteins interact with the C terminus of podocin (NPHS2; MIM 604766), and the genes are expressed in kidney podocytes, cells involved in ensuring size- and charge-selective ultrafiltration (Sellin et al., 2003 [PubMed 12424224]).[supplied by OMIM],
1739	DLG1	15	28	DLGH1, SAP-97, SAP97, dJ1061C18.1.1, hdlg	discs, large homolog 1 (Drosophila)	endoplasmic reticulum, endoplasmic reticulum membrane, cytosol, cytoskeleton, plasma membrane	GO:0000075~cell cycle checkpoint,GO:0000902~cell morphogenesis,GO:0001935~endothelial cell proliferation,GO:0007010~cytoskeleton organization,GO:0007015~actin filament organization,GO:0007093~mitotic cell cycle checkpoint,GO:0007155~cell adhesion,GO:0007163~establishment or maintenance of cell polarity,GO:0007346~regulation of mitotic cell cycle,GO:0008283~cell proliferation,GO:0016337~cell-cell …	0
5019	OXCT1	14		OXCT, SCOT	3-oxoacid CoA transferase 1	mitochondrion, mitochondrial matrix, membrane-enclosed lumen, mitochondrial lumen, organelle lumen	GO:0046950~cellular ketone body metabolic process,GO:0046952~ketone body catabolic process,	This gene encodes a member of the 3-oxoacid CoA-transferase gene family. The encoded protein is a homodimeric mitochondrial matrix enzyme that plays a central role in extrahepatic ketone body catabolism by catalyzing the reversible transfer of coenzyme A from succinyl-CoA to acetoacetate. Mutations in this gene are associated with succinyl CoA:3-oxoacid CoA transferase deficiency. [provided by Re…
84902	CEP89	14		CCDC123, CEP123	coiled-coil domain containing 123	mitochondrion	0	0
6389	SDHA	13		CMD1GG, FP, PGL5, SDH1, SDH2, SDHF	succinate dehydrogenase complex, subunit A, flavoprotein (Fp)	mitochondrion, mitochondrial envelope, mitochondrial inner membrane, mitochondrial respiratory chain, mitochondrial respiratory chain complex II	GO:0006084~acetyl-CoA metabolic process,GO:0006091~generation of precursor metabolites and energy,GO:0006099~tricarboxylic acid cycle,GO:0006105~succinate metabolic process,GO:0006732~coenzyme metabolic process,GO:0009060~aerobic respiration,GO:0009109~coenzyme catabolic process,GO:0015980~energy derivation by oxidation of organic compounds,GO:0022900~electron transport chain,GO:0022904~respirato…	This gene encodes a major catalytic subunit of succinate-ubiquinone oxidoreductase, a complex of the mitochondrial respiratory chain. The complex is composed of four nuclear-encoded subunits and is localized in the mitochondrial inner membrane. Mutations in this gene have been associated with a form of mitochondrial respiratory chain deficiency known as Leigh Syndrome. A pseudogene has been ident…
6223	RPS19	13		DBA, DBA1, S19	ribosomal protein S19 pseudogene 3; ribosomal protein S19	nucleolus, cytosol, ribosome, small ribosomal subunit, cytosolic ribosome	GO:0002520~immune system development,GO:0006364~rRNA processing,GO:0006396~RNA processing,GO:0006412~translation,GO:0006414~translational elongation,GO:0009991~response to extracellular stimulus,GO:0015669~gas transport,GO:0016072~rRNA metabolic process,GO:0022613~ribonucleoprotein complex biogenesis,GO:0030097~hemopoiesis,GO:0030099~myeloid cell differentiation,GO:0030218~erythrocyte differentia…	Ribosomes, the organelles that catalyze protein synthesis, consist of a small 40S subunit and a large 60S subunit. Together these subunits are composed of 4 RNA species and approximately 80 structurally distinct proteins. This gene encodes a ribosomal protein that is a component of the 40S subunit. The protein belongs to the S19E family of ribosomal proteins. It is located in the cytoplasm. Mutat…
1000	CDH2	13		CD325, CDHN, CDw325, NCAD	cadherin 2, type 1, N-cadherin (neuronal)	plasma membrane, cell-cell junction, adherens junction, cell-cell adherens junction, fascia adherens	GO:0001568~blood vessel development,GO:0001944~vasculature development,GO:0006461~protein complex assembly,GO:0006928~cell motion,GO:0007155~cell adhesion,GO:0007156~homophilic cell adhesion,GO:0007157~heterophilic cell adhesion,GO:0007416~synaptogenesis,GO:0010769~regulation of cell morphogenesis involved in differentiation,GO:0010975~regulation of neuron projection development,GO:0016337~cell-c…	This gene is a classical cadherin from the cadherin superfamily. The encoded protein is a calcium dependent cell-cell adhesion glycoprotein comprised of five extracellular cadherin repeats, a transmembrane region and a highly conserved cytoplasmic tail. The protein functions during gastrulation and is required for establishment of left-right asymmetry. At certain central nervous system synapses, …
4853	NOTCH2	12	16	AGS2, HJCYS, hN2	Notch homolog 2 (Drosophila)	plasma membrane, integral to plasma membrane, cell surface, integral to membrane, intrinsic to membrane	GO:0001709~cell fate determination,GO:0002009~morphogenesis of an epithelium,GO:0002011~morphogenesis of an epithelial sheet,GO:0002520~immune system development,GO:0006350~transcription,GO:0006355~regulation of transcription, DNA-dependent,GO:0006916~anti-apoptosis,GO:0006917~induction of apoptosis,GO:0007049~cell cycle,GO:0007050~cell cycle arrest,GO:0007166~cell surface receptor linked signal …	This gene encodes a member of the Notch family. Members of this Type 1 transmembrane protein family share structural characteristics including an extracellular domain consisting of multiple epidermal growth factor-like (EGF) repeats, and an intracellular domain consisting of multiple, different domain types. Notch family members play a role in a variety of developmental processes by controlling c…
51248	PDZD11	11	23	AIPP1, PDZK11, PISP	PDZ domain containing 11	extracellular region, cytosol, plasma membrane, basolateral plasma membrane, plasma membrane part	0	0
23193	GANAB	11		G2AN, GLUII	glucosidase, alpha; neutral AB	endoplasmic reticulum, Golgi apparatus, cytoplasmic membrane-bounded vesicle, cytoplasmic vesicle, vesicle	0	0
5479	PPIB	10		CYP-S1, CYPB, HEL-S-39, OI9, SCYLP	peptidylprolyl isomerase B (cyclophilin B)	endoplasmic reticulum, endoplasmic reticulum lumen, cytoplasmic membrane-bounded vesicle, cytoplasmic vesicle, membrane-enclosed lumen	GO:0006457~protein folding,	The protein encoded by this gene is a cyclosporine-binding protein and is mainly located within the endoplasmic reticulum. It is associated with the secretory pathway and released in biological fluids. This protein can bind to cells derived from T- and B-lymphocytes, and may regulate cyclosporine A-mediated immunosuppression. [provided by RefSeq],
2746	GLUD1	10		GDH, GDH1, GLUD	glutamate dehydrogenase 1	mitochondrion, mitochondrial matrix, membrane-enclosed lumen, mitochondrial lumen, organelle lumen	GO:0002791~regulation of peptide secretion,GO:0002793~positive regulation of peptide secretion,GO:0006536~glutamate metabolic process,GO:0006537~glutamate biosynthetic process,GO:0006538~glutamate catabolic process,GO:0008652~cellular amino acid biosynthetic process,GO:0009063~cellular amino acid catabolic process,GO:0009064~glutamine family amino acid metabolic process,GO:0009065~glutamine famil…	L-glutamate dehydrogenase (EC 1.4.1.3) has a central role in nitrogen metabolism in plants and animals. Glutamate dehydrogenase is found in all organisms and catalyzes the oxidative deamination of 1-glutamate to 2-oxoglutarate (Smith et al., 2001 [PubMed 11254391]). Glutamate, the main substrate of GLUD, is present in brain in concentrations higher than in other organs. In nervous tissue, GLUD ap…
1969	EPHA2	9	10	ARCC2, CTPA, CTPP1, CTRCT6, ECK	EPH receptor A2	plasma membrane, integral to plasma membrane, integral to membrane, intrinsic to membrane, intrinsic to plasma membrane	GO:0006468~protein amino acid phosphorylation,GO:0006793~phosphorus metabolic process,GO:0006796~phosphate metabolic process,GO:0007166~cell surface receptor linked signal transduction,GO:0007167~enzyme linked receptor protein signaling pathway,GO:0007169~transmembrane receptor protein tyrosine kinase signaling pathway,GO:0016310~phosphorylation,GO:0030182~neuron differentiation,GO:0048013~ephrin…	This gene belongs to the ephrin receptor subfamily of the protein-tyrosine kinase family. EPH and EPH-related receptors have been implicated in mediating developmental events, particularly in the nervous system. Receptors in the EPH subfamily typically have a single kinase domain and an extracellular region containing a Cys-rich domain and 2 fibronectin type III repeats. The ephrin receptors are …
2011	MARK2	9	8	EMK-1, EMK1, PAR-1, Par-1b, Par1b	MAP/microtubule affinity-regulating kinase 2	plasma membrane, cell cortex, extrinsic to membrane, cell cortex part, basal part of cell	GO:0000902~cell morphogenesis,GO:0006468~protein amino acid phosphorylation,GO:0006793~phosphorus metabolic process,GO:0006796~phosphate metabolic process,GO:0007163~establishment or maintenance of cell polarity,GO:0007242~intracellular signaling cascade,GO:0007243~protein kinase cascade,GO:0016310~phosphorylation,GO:0032989~cellular component morphogenesis,GO:0035088~establishment or maintenance…	EMK (ELKL Motif Kinase) is a small family of ser/thr protein kinases involved in the control of cell polarity, microtubule stability and cancer. Several cDNA clones have been isolated that encoded two isoforms of the human ser/thr protein kinase EMK1. These isoforms were characterized by the presence of a 162-bp alternative exon that gave rise to two forms, one containing the exon and the other o…
539	ATP5O	9		ATPO, OSCP	ATP synthase, H+ transporting, mitochondrial F1 complex, O subunit	mitochondrial proton-transporting ATP synthase complex, coupling factor F(o), mitochondrion, mitochondrial envelope, mitochondrial inner membrane, mitochondrial proton-transporting ATP synthase complex	GO:0006091~generation of precursor metabolites and energy,GO:0006119~oxidative phosphorylation,GO:0006163~purine nucleotide metabolic process,GO:0006164~purine nucleotide biosynthetic process,GO:0006195~purine nucleotide catabolic process,GO:0006200~ATP catabolic process,GO:0006754~ATP biosynthetic process,GO:0006793~phosphorus metabolic process,GO:0006796~phosphate metabolic process,GO:0006811~i…	The protein encoded by this gene is a component of the F-type ATPase found in the mitochondrial matrix. F-type ATPases are composed of a catalytic core and a membrane proton channel. The encoded protein appears to be part of the connector linking these two components and may be involved in transmission of conformational changes or proton conductance. [provided by RefSeq],
6230	RPS25	9		S25	ribosomal protein S25 pseudogene 8; ribosomal protein S25	nucleolus, cytosol, ribosome, small ribosomal subunit, cytosolic ribosome	GO:0006412~translation,GO:0006414~translational elongation,	Ribosomes, the organelles that catalyze protein synthesis, consist of a small 40S subunit and a large 60S subunit. Together these subunits are composed of 4 RNA species and approximately 80 structurally distinct proteins. This gene encodes a ribosomal protein that is a component of the 40S subunit. The protein belongs to the S25E family of ribosomal proteins. It is located in the cytoplasm. As is…
226	ALDOA	9		ALDA, GSD12, HEL-S-87p	aldolase A, fructose-bisphosphate	extracellular region, cytoskeleton, actin cytoskeleton, myofibril, sarcomere	GO:0003012~muscle system process,GO:0005996~monosaccharide metabolic process,GO:0006000~fructose metabolic process,GO:0006006~glucose metabolic process,GO:0006007~glucose catabolic process,GO:0006091~generation of precursor metabolites and energy,GO:0006096~glycolysis,GO:0006163~purine nucleotide metabolic process,GO:0006164~purine nucleotide biosynthetic process,GO:0006754~ATP biosynthetic proce…	This gene product, Aldolase A (fructose-bisphosphate aldolase) is a glycolytic enzyme that catalyzes the reversible conversion of fructose-1,6-bisphosphate to glyceraldehyde 3-phosphate and dihydroxyacetone phosphate. Three aldolase isozymes (A, B, and C), encoded by three different genes, are differentially expressed during development. Aldolase A is found in the developing embryo and is produce…
55704	CCDC88A	8	13	APE, GIRDIN, GIV, GRDN, HkRP1, KIAA1212	coiled-coil domain containing 88A	endoplasmic reticulum, Golgi apparatus, cytosol, plasma membrane, cytoplasmic membrane-bounded vesicle	GO:0001932~regulation of protein amino acid phosphorylation,GO:0006259~DNA metabolic process,GO:0006260~DNA replication,GO:0006275~regulation of DNA replication,GO:0006928~cell motion,GO:0016044~membrane organization,GO:0016477~cell migration,GO:0019220~regulation of phosphate metabolic process,GO:0030030~cell projection organization,GO:0030031~cell projection assembly,GO:0030032~lamellipodium as…	0
80728	ARHGAP39	8	10	CrGAP, Vilse	KIAA1688 protein	cytoskeleton, non-membrane-bounded organelle, intracellular non-membrane-bounded organelle	0	0
139065	SLITRK4	8	8	-	SLIT and NTRK-like family, member 4	integral to membrane, intrinsic to membrane	GO:0000902~cell morphogenesis,GO:0000904~cell morphogenesis involved in differentiation,GO:0007409~axonogenesis,GO:0030030~cell projection organization,GO:0030182~neuron differentiation,GO:0031175~neuron projection development,GO:0032989~cellular component morphogenesis,GO:0032990~cell part morphogenesis,GO:0048666~neuron development,GO:0048667~cell morphogenesis involved in neuron differentiatio…	Members of the SLITRK family, such as SLITRK4, are integral membrane proteins with 2 N-terminal leucine-rich repeat (LRR) domains similar to those of SLIT proteins (see SLIT1; MIM 603742). Most SLITRKs, including SLITRK4, also have C-terminal regions that share homology with neurotrophin receptors (see NTRK1; MIM 191315). SLITRKs are expressed predominantly in neural tissues and have neurite-modu…
10797	MTHFD2	8		NMDMC	methylenetetrahydrofolate dehydrogenase (NADP+ dependent) 2, methenyltetrahydrofolate cyclohydrolase	mitochondrion	GO:0006730~one-carbon metabolic process,GO:0006732~coenzyme metabolic process,GO:0006760~folic acid and derivative metabolic process,GO:0009108~coenzyme biosynthetic process,GO:0009396~folic acid and derivative biosynthetic process,GO:0042558~pteridine and derivative metabolic process,GO:0046653~tetrahydrofolate metabolic process,GO:0051186~cofactor metabolic process,GO:0051188~cofactor biosynthe…	This gene encodes a nuclear-encoded mitochondrial bifunctional enzyme with methylenetetrahydrofolate dehydrogenase and methenyltetrahydrofolate cyclohydrolase activities. The enzyme functions as a homodimer and is unique in its absolute requirement for magnesium and inorganic phosphate. Formation of the enzyme-magnesium complex allows binding of NAD. Alternative splicing results in two different …
5230	PGK1	8		HEL-S-68p, MIG10, PGKA	phosphoglycerate kinase 1		GO:0005996~monosaccharide metabolic process,GO:0006006~glucose metabolic process,GO:0006007~glucose catabolic process,GO:0006091~generation of precursor metabolites and energy,GO:0006096~glycolysis,GO:0006793~phosphorus metabolic process,GO:0006796~phosphate metabolic process,GO:0016052~carbohydrate catabolic process,GO:0016310~phosphorylation,GO:0019318~hexose metabolic process,GO:0019320~hexose…	The protein encoded by this gene is a glycolytic enzyme that catalyzes the conversion of 1,3-diphosphoglycerate to 3-phosphoglycerate. The encoded protein may also act as a cofactor for polymerase alpha. This gene lies on the X-chromosome, while a related pseudogene also has been found on the X-chromosome and another on chromosome 19. [provided by RefSeq],
5589	PRKCSH	8		AGE-R2, G19P1, PCLD, PKCSH, PLD1	protein kinase C substrate 80K-H	endoplasmic reticulum	GO:0007242~intracellular signaling cascade,GO:0007243~protein kinase cascade,	This gene encodes the beta-subunit of glucosidase II, an N-linked glycan-processing enzyme in the endoplasmic reticulum (ER). This protein is an acidic phospho-protein known to be a substrate for protein kinase C. Mutations in this gene have been associated with the autosomal dominant polycystic liver disease (PCLD). Alternatively spliced transcript variants encoding distinct isoforms have been o…
9448	MAP4K4	7	11	FLH21957, HEL-S-31, HGK, MEKKK4, NIK	mitogen-activated protein kinase kinase kinase kinase 4		GO:0006468~protein amino acid phosphorylation,GO:0006793~phosphorus metabolic process,GO:0006796~phosphate metabolic process,GO:0007242~intracellular signaling cascade,GO:0007243~protein kinase cascade,GO:0016310~phosphorylation,	The protein encoded by this gene is a member of the serine/threonine protein kinase family. This kinase has been shown to specifically activate MAPK8/JNK. The activation of MAPK8 by this kinase is found to be inhibited by the dominant-negative mutants of MAP3K7/TAK1, MAP2K4/MKK4, and MAP2K7/MKK7, which suggests that this kinase may function through the MAP3K7-MAP2K4-MAP2K7 kinase cascade, and med…
6558	SLC12A2	7	11	BSC, BSC2, NKCC1, PPP1R141	solute carrier family 12 (sodium/potassium/chloride transporters), member 2	cell fraction, membrane fraction, insoluble fraction, plasma membrane, integral to plasma membrane	GO:0006811~ion transport,GO:0006812~cation transport,GO:0006813~potassium ion transport,GO:0006814~sodium ion transport,GO:0006820~anion transport,GO:0006821~chloride transport,GO:0006884~cell volume homeostasis,GO:0006970~response to osmotic stress,GO:0006972~hyperosmotic response,GO:0007166~cell surface receptor linked signal transduction,GO:0007186~G-protein coupled receptor protein signaling …	By moving chloride into epithelial cells, the Na-K-Cl cotransporter SLC12A2 aids transcellular movement of chloride across both secretory and absorptive epithelia (Payne et al., 1995 [PubMed 7629105]). See also SLC12A1 (MIM 600839) and SLC12A3 (MIM 600968).[supplied by OMIM],
682	BSG	7	7	5F7, CD147, EMMPRIN, M6, OK, TCSF	basigin (Ok blood group)	Golgi membrane, mitochondrion, Golgi apparatus, plasma membrane, endomembrane system	GO:0001890~placenta development,GO:0001893~maternal placenta development,GO:0003006~reproductive developmental process,GO:0006090~pyruvate metabolic process,GO:0007166~cell surface receptor linked signal transduction,GO:0007565~female pregnancy,GO:0007566~embryo implantation,GO:0009719~response to endogenous stimulus,GO:0009725~response to hormone stimulus,GO:0010033~response to organic substance…	The protein encoded by this gene is a plasma membrane protein that is important in spermatogenesis, embryo implantation, neural network formation, and tumor progression. The encoded protein is also a member of the immunoglobulin superfamily. Multiple transcript variants encoding different isoforms have been found for this gene. [provided by RefSeq],
10961	ERP29	7		C12orf8, ERp28, ERp31, HEL-S-107, PDI-DB, PDIA9	endoplasmic reticulum protein 29	endoplasmic reticulum, endoplasmic reticulum lumen, cytoplasmic membrane-bounded vesicle, cytoplasmic vesicle, membrane-enclosed lumen	GO:0006457~protein folding,GO:0006886~intracellular protein transport,GO:0008104~protein localization,GO:0009306~protein secretion,GO:0015031~protein transport,GO:0032940~secretion by cell,GO:0034613~cellular protein localization,GO:0045184~establishment of protein localization,GO:0046903~secretion,GO:0046907~intracellular transport,GO:0070727~cellular macromolecule localization,	This gene encodes a reticuloplasmin, a protein which resides in the lumen of the endoplasmic reticulum (ER). The protein shows sequence similarity to the protein disulfide isomerase family. However, it lacks the thioredoxin motif characteristic of this family, suggesting that this protein does not function as a disulfide isomerase. The protein dimerizes and is thought to play a role in the proces…
100529239	RPS10-NUDT3	7		-	-	-	-	-
9462	RASAL2	6	14	NGAP	RAS protein activator like 2		GO:0051056~regulation of small GTPase mediated signal transduction,	This gene encodes a protein that contains the GAP-related domain (GRD), a characteristic domain of GTPase-activating proteins (GAPs). GAPs function as activators of Ras superfamily of small GTPases. The protein encoded by this gene is able to complement the defective RasGAP function in a yeast system. Two alternatively spliced transcript variants of this gene encoding distinct isoforms have been …
728047	LOC728047	6		-	similar to Golgin subfamily A member 8-like protein 2; Golgin subfamily A member 8-like protein 1; Golgin subfamily A member 8-like protein 3; golgi autoantigen, golgin subfamily a, 9 pseudogene; similar to golgi autoantigen, golgin subfamily a, 8E	Golgi apparatus, extrinsic to membrane	0	0
26115	TANC2	6		ROLSA, rols	tetratricopeptide repeat, ankyrin repeat and coiled-coil containing 2		0	0
3151	HMGN2	5		HMG17	hypothetical LOC729505; similar to hCG2040565; high-mobility group nucleosomal binding domain 2; similar to high-mobility group nucleosomal binding domain 2	chromatin, chromosome, non-membrane-bounded organelle, intracellular non-membrane-bounded organelle, chromosomal part	GO:0006325~chromatin organization,GO:0006355~regulation of transcription, DNA-dependent,GO:0045449~regulation of transcription,GO:0051252~regulation of RNA metabolic process,GO:0051276~chromosome organization,	0
11187	PKP3	5		-	plakophilin 3	plasma membrane, cell-cell junction, apicolateral plasma membrane, cell junction, desmosome	GO:0007155~cell adhesion,GO:0022610~biological adhesion,	This gene encodes a member of the arm-repeat (armadillo) and plakophilin gene families. Plakophilin proteins contain numerous armadillo repeats, localize to cell desmosomes and nuclei, and participate in linking cadherins to intermediate filaments in the cytoskeleton. This protein may act in cellular desmosome-dependent adhesion and signaling pathways. [provided by RefSeq],
23677	SH3BP4	5		BOG25, TTP	SH3-domain binding protein 4	coated pit, endomembrane system, cytoplasmic membrane-bounded vesicle, coated vesicle, clathrin-coated vesicle	GO:0006897~endocytosis,GO:0007049~cell cycle,GO:0010324~membrane invagination,GO:0016044~membrane organization,GO:0016192~vesicle-mediated transport,	This gene encodes a protein with 3 Asn-Pro-Phe (NPF) motifs, an SH3 domain, a PXXP motif, a bipartite nuclear targeting signal, and a tyrosine phosphorylation site. This protein is involved in cargo-specific control of clathrin-mediated endocytosis, specifically controlling the internalization of a specific protein receptor. [provided by RefSeq],
347734	SLC35B2	4		PAPST1, SLL, UGTrel4	solute carrier family 35, member B2	Golgi apparatus, integral to membrane, intrinsic to membrane	GO:0009967~positive regulation of signal transduction,GO:0010627~regulation of protein kinase cascade,GO:0010647~positive regulation of cell communication,GO:0010740~positive regulation of protein kinase cascade,GO:0015858~nucleoside transport,GO:0015860~purine nucleoside transport,GO:0015931~nucleobase, nucleoside, nucleotide and nucleic acid transport,GO:0043122~regulation of I-kappaB kinase/NF…	Sulfotransferases (e.g., SULT4A1; MIM 608359) use an activated form of sulfate, 3-prime-phosphoadenosine 5-prime-phosphosulfate (PAPS), as a common sulfate donor for sulfation of glycoproteins, proteoglycans, and glycolipids in the endoplasmic reticulum and Golgi apparatus. SLC35B2 is located in the microsomal membrane and transports PAPS from the cytosol, where it is synthesized, into the Golgi …
4174	MCM5	4		CDC46, P1-CDC46	minichromosome maintenance complex component 5	nucleoplasm, membrane-enclosed lumen, nuclear lumen, organelle lumen, intracellular organelle lumen	GO:0006259~DNA metabolic process,GO:0006260~DNA replication,GO:0006261~DNA-dependent DNA replication,GO:0006270~DNA replication initiation,GO:0006350~transcription,GO:0045449~regulation of transcription,GO:0051301~cell division,	The protein encoded by this gene is structurally very similar to the CDC46 protein from S. cerevisiae, a protein involved in the initiation of DNA replication. The encoded protein is a member of the MCM family of chromatin-binding proteins and can interact with at least two other members of this family. The encoded protein is upregulated in the transition from the G0 to G1/S phase of the cell cyc…
6182	MRPL12	4		5c5-2, L12mt, MRP-L31/34, MRPL7, MRPL7/L12, RPML12	mitochondrial ribosomal protein L12	organellar ribosome, organellar large ribosomal subunit, mitochondrion, mitochondrial matrix, mitochondrial ribosome	GO:0006350~transcription,GO:0006351~transcription, DNA-dependent,GO:0006355~regulation of transcription, DNA-dependent,GO:0006390~transcription from mitochondrial promoter,GO:0006412~translation,GO:0007005~mitochondrion organization,GO:0009891~positive regulation of biosynthetic process,GO:0010557~positive regulation of macromolecule biosynthetic process,GO:0010604~positive regulation of macromol…	Mammalian mitochondrial ribosomal proteins are encoded by nuclear genes and help in protein synthesis within the mitochondrion. Mitochondrial ribosomes (mitoribosomes) consist of a small 28S subunit and a large 39S subunit. They have an estimated 75% protein to rRNA composition compared to prokaryotic ribosomes, where this ratio is reversed. Another difference between mammalian mitoribosomes and …
6427	SRSF2	4		PR264, SC-35, SC35, SFRS2, SFRS2A, SRp30b	splicing factor, arginine/serine-rich 2	nucleoplasm, nuclear body, PML body, nuclear speck, membrane-enclosed lumen	GO:0000375~RNA splicing, via transesterification reactions,GO:0000377~RNA splicing, via transesterification reactions with bulged adenosine as nucleophile,GO:0000398~nuclear mRNA splicing, via spliceosome,GO:0006396~RNA processing,GO:0006397~mRNA processing,GO:0008380~RNA splicing,GO:0016071~mRNA metabolic process,	0
8773	SNAP23		17	HsT17016, SNAP-23, SNAP23A, SNAP23B	synaptosomal-associated protein, 23kDa	cell fraction, lytic vacuole, plasma membrane enriched fraction, membrane fraction, insoluble fraction	GO:0006892~post-Golgi vesicle-mediated transport,GO:0006903~vesicle targeting,GO:0006944~membrane fusion,GO:0008104~protein localization,GO:0015031~protein transport,GO:0016044~membrane organization,GO:0016192~vesicle-mediated transport,GO:0045184~establishment of protein localization,GO:0046907~intracellular transport,GO:0048193~Golgi vesicle transport,GO:0051640~organelle localization,GO:005164…	Specificity of vesicular transport is regulated, in part, by the interaction of a vesicle-associated membrane protein termed synaptobrevin/VAMP with a target compartment membrane protein termed syntaxin. These proteins, together with SNAP25 (synaptosome-associated protein of 25 kDa), form a complex which serves as a binding site for the general membrane fusion machinery. Synaptobrevin/VAMP and sy…
10723	SLC12A7		14	KCC4	solute carrier family 12 (potassium/chloride transporters), member 7	plasma membrane, integral to plasma membrane, integral to membrane, intrinsic to membrane, intrinsic to plasma membrane	GO:0006811~ion transport,GO:0006812~cation transport,GO:0006813~potassium ion transport,GO:0006814~sodium ion transport,GO:0006820~anion transport,GO:0006821~chloride transport,GO:0006884~cell volume homeostasis,GO:0015672~monovalent inorganic cation transport,GO:0015698~inorganic anion transport,GO:0019725~cellular homeostasis,GO:0030001~metal ion transport,GO:0042592~homeostatic process,GO:0055…	0
144402	CPNE8		12	-	copine VIII		0	Calcium-dependent membrane-binding proteins may regulate molecular events at the interface of the cell membrane and cytoplasm. This gene is one of several genes that encode a calcium-dependent protein containing two N-terminal type II C2 domains and an integrin A domain-like sequence in the C-terminus. [provided by RefSeq],
101059918	LOC101059918		11	-	-	-	-	-
7779	SLC30A1		11	ZNT1, ZRC1	solute carrier family 30 (zinc transporter), member 1	plasma membrane, integral to membrane, intrinsic to membrane	GO:0000041~transition metal ion transport,GO:0001701~in utero embryonic development,GO:0006811~ion transport,GO:0006812~cation transport,GO:0006829~zinc ion transport,GO:0006873~cellular ion homeostasis,GO:0006882~cellular zinc ion homeostasis,GO:0009792~embryonic development ending in birth or egg hatching,GO:0019725~cellular homeostasis,GO:0030001~metal ion transport,GO:0030003~cellular cation …	0
64969	MRPS5		9	MRP-S5, S5mt	mitochondrial ribosomal protein S5	mitochondrion, ribosome, ribonucleoprotein complex, non-membrane-bounded organelle, intracellular non-membrane-bounded organelle	GO:0006412~translation,	Mammalian mitochondrial ribosomal proteins are encoded by nuclear genes and help in protein synthesis within the mitochondrion. Mitochondrial ribosomes (mitoribosomes) consist of a small 28S subunit and a large 39S subunit. They have an estimated 75% protein to rRNA composition compared to prokaryotic ribosomes, where this ratio is reversed. Another difference between mammalian mitoribosomes and …
4920	ROR2		9	BDB, BDB1, NTRKR2	receptor tyrosine kinase-like orphan receptor 2	plasma membrane, integral to plasma membrane, integral to membrane, intrinsic to membrane, intrinsic to plasma membrane	GO:0000165~MAPKKK cascade,GO:0001501~skeletal system development,GO:0001502~cartilage condensation,GO:0001756~somitogenesis,GO:0003002~regionalization,GO:0003006~reproductive developmental process,GO:0006468~protein amino acid phosphorylation,GO:0006793~phosphorus metabolic process,GO:0006796~phosphate metabolic process,GO:0007155~cell adhesion,GO:0007166~cell surface receptor linked signal trans…	The protein encoded by this gene is a receptor protein tyrosine kinase and type I transmembrane protein that belongs to the ROR subfamily of cell surface receptors. The protein may be involved in the early formation of the chondrocytes and may be required for cartilage and growth plate development. Mutations in this gene can cause brachydactyly type B, a skeletal disorder characterized by hypopla…
134549	SHROOM1		9	APXL2	shroom family member 1	cytoskeleton, microtubule, actin cytoskeleton, microtubule cytoskeleton, myosin complex	GO:0000902~cell morphogenesis,GO:0007010~cytoskeleton organization,GO:0007015~actin filament organization,GO:0030029~actin filament-based process,GO:0030036~actin cytoskeleton organization,GO:0032989~cellular component morphogenesis,GO:0051017~actin filament bundle formation,	SHROOM family members play diverse roles in the development of the nervous system and other tissues (Hagens et al., 2006 [PubMed 16615870]).[supplied by OMIM],
28982	FLVCR1		7	AXPC1, FLVCR, MFSD7B, PCA, PCARP	feline leukemia virus subgroup C cellular receptor 1	plasma membrane, integral to plasma membrane, integral to membrane, intrinsic to membrane, intrinsic to plasma membrane	GO:0001701~in utero embryonic development,GO:0002520~immune system development,GO:0009792~embryonic development ending in birth or egg hatching,GO:0010171~body morphogenesis,GO:0030097~hemopoiesis,GO:0030099~myeloid cell differentiation,GO:0030218~erythrocyte differentiation,GO:0030326~embryonic limb morphogenesis,GO:0034101~erythrocyte homeostasis,GO:0035107~appendage morphogenesis,GO:0035108~li…	0
6542	SLC7A2		7	ATRC2, CAT2, HCAT2	solute carrier family 7 (cationic amino acid transporter, y+ system), member 2	cell fraction, membrane fraction, insoluble fraction, plasma membrane, integral to plasma membrane	GO:0006865~amino acid transport,GO:0015837~amine transport,GO:0015849~organic acid transport,GO:0046942~carboxylic acid transport,	0
255057	C19orf26		6	DOS	chromosome 19 open reading frame 26	integral to membrane, intrinsic to membrane	0	0
1525	CXADR		5	CAR, CAR4/6, HCAR	coxsackie virus and adenovirus receptor pseudogene 2; coxsackie virus and adenovirus receptor	extracellular region, Golgi apparatus, plasma membrane, integral to plasma membrane, cell-cell junction	GO:0007005~mitochondrion organization,GO:0007155~cell adhesion,GO:0007507~heart development,GO:0007517~muscle organ development,GO:0008285~negative regulation of cell proliferation,GO:0014706~striated muscle tissue development,GO:0016202~regulation of striated muscle tissue development,GO:0022610~biological adhesion,GO:0034330~cell junction organization,GO:0040008~regulation of growth,GO:0042127~…	The protein encoded by this gene is a type I membrane receptor for group B coxsackieviruses and subgroup C adenoviruses. Pseudogenes of this gene are found on chromosomes 15, 18, and 21. [provided by RefSeq],
8500	PPFIA1		5	LIP.1, LIP1, LIPRIN	protein tyrosine phosphatase, receptor type, f polypeptide (PTPRF), interacting protein (liprin), alpha 1		GO:0007155~cell adhesion,GO:0007160~cell-matrix adhesion,GO:0022610~biological adhesion,GO:0031589~cell-substrate adhesion,	The protein encoded by this gene is a member of the LAR protein-tyrosine phosphatase-interacting protein (liprin) family. Liprins interact with members of LAR family of transmembrane protein tyrosine phosphatases, which are known to be important for axon guidance and mammary gland development. This protein binds to the intracellular membrane-distal phosphatase domain of tyrosine phosphatase LAR, …
23657	SLC7A11		5	CCBR1, xCT	solute carrier family 7, (cationic amino acid transporter, y+ system) member 11	plasma membrane, integral to membrane, intrinsic to membrane	GO:0006865~amino acid transport,GO:0009636~response to toxin,GO:0015837~amine transport,GO:0015849~organic acid transport,GO:0046942~carboxylic acid transport,	SLC7A11 is a member of a heteromeric Na(+)-independent anionic amino acid transport system highly specific for cystine and glutamate. In this system, designated system Xc(-), the anionic form of cystine is transported in exchange for glutamate.[supplied by OMIM],
26050	SLITRK5		5	LRRC11, bA364G4.2	SLIT and NTRK-like family, member 5	integral to membrane, intrinsic to membrane	GO:0000902~cell morphogenesis,GO:0000904~cell morphogenesis involved in differentiation,GO:0007409~axonogenesis,GO:0030030~cell projection organization,GO:0030182~neuron differentiation,GO:0031175~neuron projection development,GO:0032989~cellular component morphogenesis,GO:0032990~cell part morphogenesis,GO:0048666~neuron development,GO:0048667~cell morphogenesis involved in neuron differentiatio…	Members of the SLITRK family, such as SLITRK5, are integral membrane proteins with 2 N-terminal leucine-rich repeat (LRR) domains similar to those of SLIT proteins (see SLIT1; MIM 603742). Most SLITRKs, including SLITRK5, also have C-terminal regions that share homology with neurotrophin receptors (see NTRK1; MIM 191315). SLITRKs are expressed predominantly in neural tissues and have neurite-modu…
9131	AIFM1		4	AIF, CMT2D, CMTX4, COWCK, COXPD6, NADMR, NAMSD, PDCD8	apoptosis-inducing factor, mitochondrion-associated, 1	cell fraction, membrane fraction, soluble fraction, insoluble fraction, mitochondrion	GO:0000737~DNA catabolic process, endonucleolytic,GO:0006259~DNA metabolic process,GO:0006308~DNA catabolic process,GO:0006309~DNA fragmentation involved in apoptosis,GO:0006323~DNA packaging,GO:0006915~apoptosis,GO:0006917~induction of apoptosis,GO:0006921~cell structure disassembly during apoptosis,GO:0006974~response to DNA damage stimulus,GO:0006997~nucleus organization,GO:0007242~intracellul…	This gene encodes a flavoprotein essential for nuclear disassembly in apoptotic cells that is found in the mitochondrial intermembrane space in healthy cells. Induction of apoptosis results in the translocation of this protein to the nucleus where it effects chromosome condensation and fragmentation. In addition, this gene product induces mitochondria to release the apoptogenic proteins cytochrom…
3105	HLA-A		4	HLAA	major histocompatibility complex, class I, A	Golgi membrane, endosome, early endosome, Golgi apparatus, plasma membrane	GO:0002474~antigen processing and presentation of peptide antigen via MHC class I,GO:0006955~immune response,GO:0019882~antigen processing and presentation,GO:0048002~antigen processing and presentation of peptide antigen,	HLA-A belongs to the HLA class I heavy chain paralogues. This class I molecule is a heterodimer consisting of a heavy chain and a light chain (beta-2 microglobulin). The heavy chain is anchored in the membrane. Class I molecules play a central role in the immune system by presenting peptides derived from the endoplasmic reticulum lumen. They are expressed in nearly all cells. The heavy chain is a…
26153	KIF26A		4	-	kinesin family member 26A	cytoskeleton, microtubule, microtubule cytoskeleton, non-membrane-bounded organelle, intracellular non-membrane-bounded organelle	GO:0007017~microtubule-based process,GO:0007018~microtubule-based movement,	0
55083	KIF26B		4	-	kinesin family member 26B	cytoskeleton, microtubule, microtubule cytoskeleton, non-membrane-bounded organelle, intracellular non-membrane-bounded organelle	GO:0007017~microtubule-based process,GO:0007018~microtubule-based movement,	0
51119	SBDS		4	SDS, SWDS	Shwachman-Bodian-Diamond syndrome pseudogene; Shwachman-Bodian-Diamond syndrome	spindle pole, nucleolus, spindle, cytoskeleton, microtubule cytoskeleton	GO:0001501~skeletal system development,GO:0001503~ossification,GO:0001701~in utero embryonic development,GO:0001824~blastocyst development,GO:0001832~blastocyst growth,GO:0001833~inner cell mass cell proliferation,GO:0002520~immune system development,GO:0006364~rRNA processing,GO:0006396~RNA processing,GO:0006928~cell motion,GO:0006935~chemotaxis,GO:0007026~negative regulation of microtubule depo…	This gene encodes a member of a highly conserved protein family that exists from archaea to vertebrates and plants. The encoded protein may function in RNA metabolism. Mutations within this gene are associated with Shwachman-Bodian-Diamond syndrome. An alternative transcript has been described, but its biological nature has not been determined. This gene has a closely linked pseudogene that is di…
55240	STEAP3		4	AHMIO2, STMP3, TSAP6, dudlin-2	STEAP family member 3	endosome, plasma membrane, integral to membrane, intrinsic to membrane	GO:0000041~transition metal ion transport,GO:0006811~ion transport,GO:0006812~cation transport,GO:0006826~iron ion transport,GO:0006915~apoptosis,GO:0007049~cell cycle,GO:0008219~cell death,GO:0012501~programmed cell death,GO:0015674~di-, tri-valent inorganic cation transport,GO:0016265~death,GO:0030001~metal ion transport,GO:0055114~oxidation reduction,	0
